# Supplementary material for: Atomic layer deposition for surface area determination of solid oxide electrodes
Source: Royal Society of Chemistry journal article supplement (doi:10.1039/d2ta09060k), 2023-01-01
Supplement: d2ta09060k1.pdf [file d2ta09060k1.pdf]

Electronic Supplementary Information

### Atomic Layer Deposition for Surface Area Determination of Solid Oxide Electrodes

Travis Schmauss and Scott Barnett

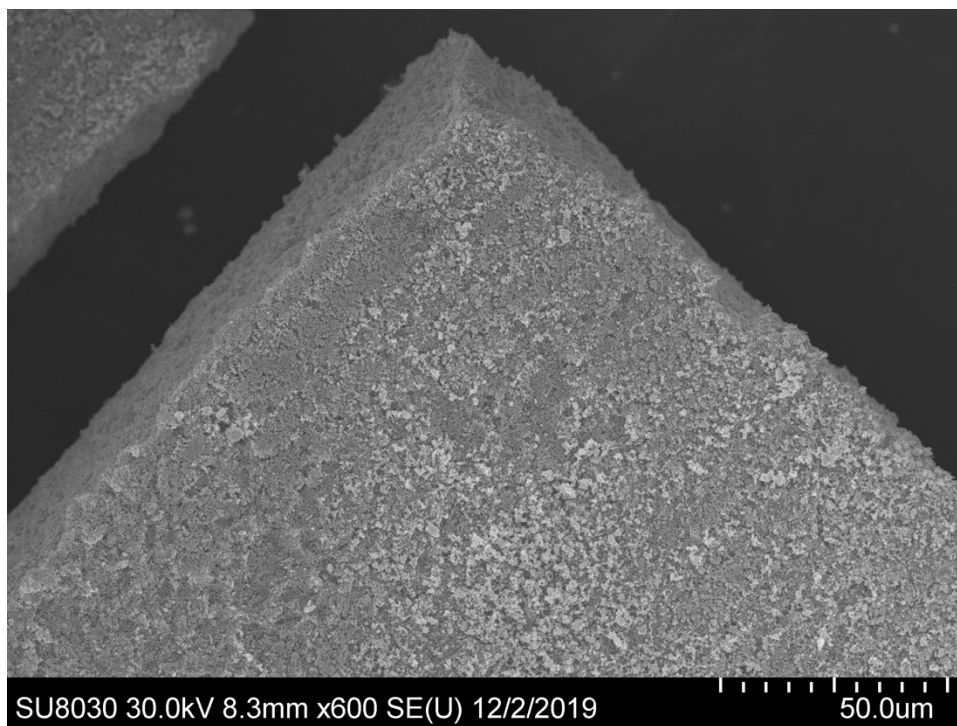

**Figure S1.** Scanning electron micrograph of self-supported, bulk LSM/GDC fired to create quantities large enough for BET measurement (~1 g material per measurement). The microstructure is equivalent to electrodes fired atop GDC substrates.

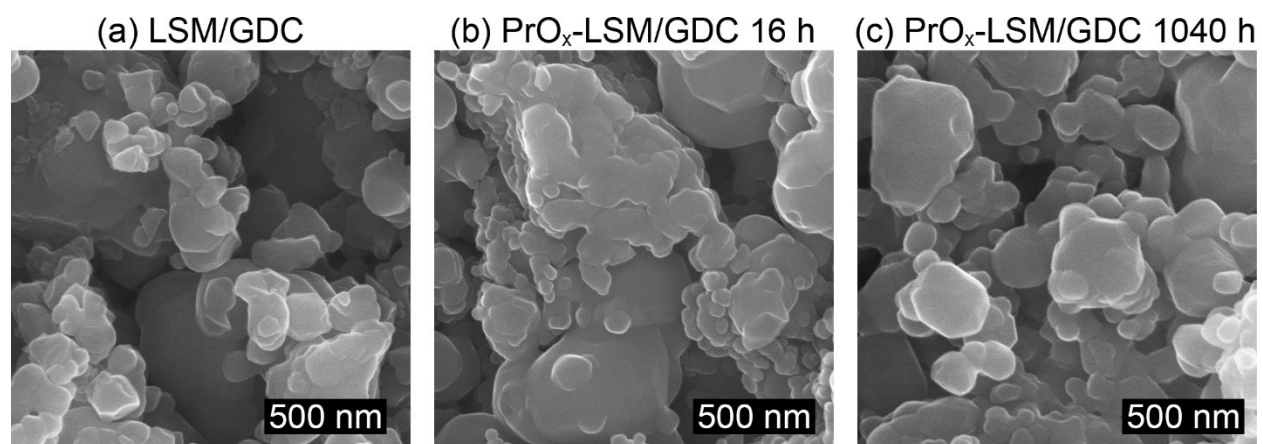

**Figure S2** Comparison between the (a) as-fired LSM/GDC, (b) PrO<sub>x</sub>-infiltrated LSM/GDC after 16 h at 700°C, and (c) PrO<sub>x</sub>-infiltrated LSM/GDC after 1040 h at 700°C. Morphological differences are subtle and would be difficult to identify by sight.
